# Supplementary material for: Hepatic lipopolysaccharide binding protein partially uncouples inflammation from fibrosis in MAFLD
Source: JCI journal article supplement (doi:10.1172/jci179752), 2024-07-26

**Full unedited blots:**

Full unedited blot (left) and merged with markers (right) for Supplemental Figure 2J, GAPDH.

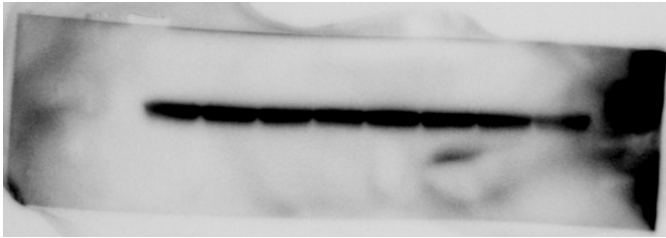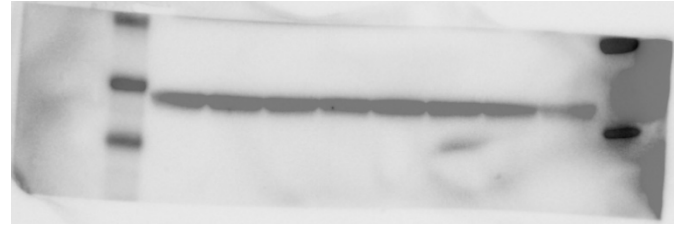

Full unedited blot (left) and merged with markers (right) for Supplemental Figure 2J, pERK.

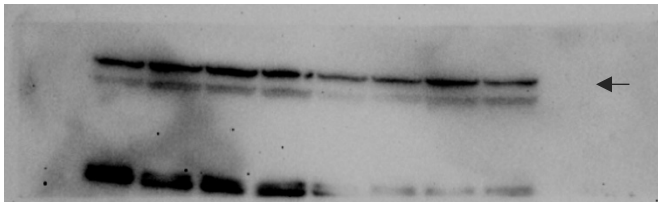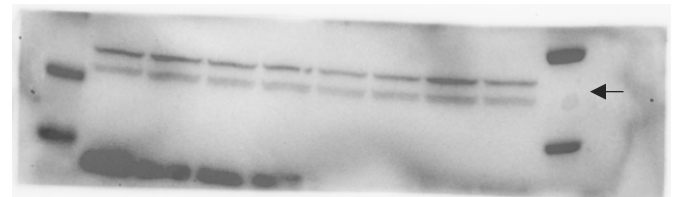

Supplement: sd2 [file 2]
